# Supplementary material
Source: publisher figshare collection journal article supplement (https://frontiersin.figshare.com/ndownloader/files/21787593)

Maximum Likelihood method based on the HKY+G model.  
The phylogenetic reconstruction tree was run with 1000  
replicates.

The analysis involved 100 nucleotide sequences of the complete gene 1302 bp in the final dataset. Data source: <https://plasmodb.org/>.

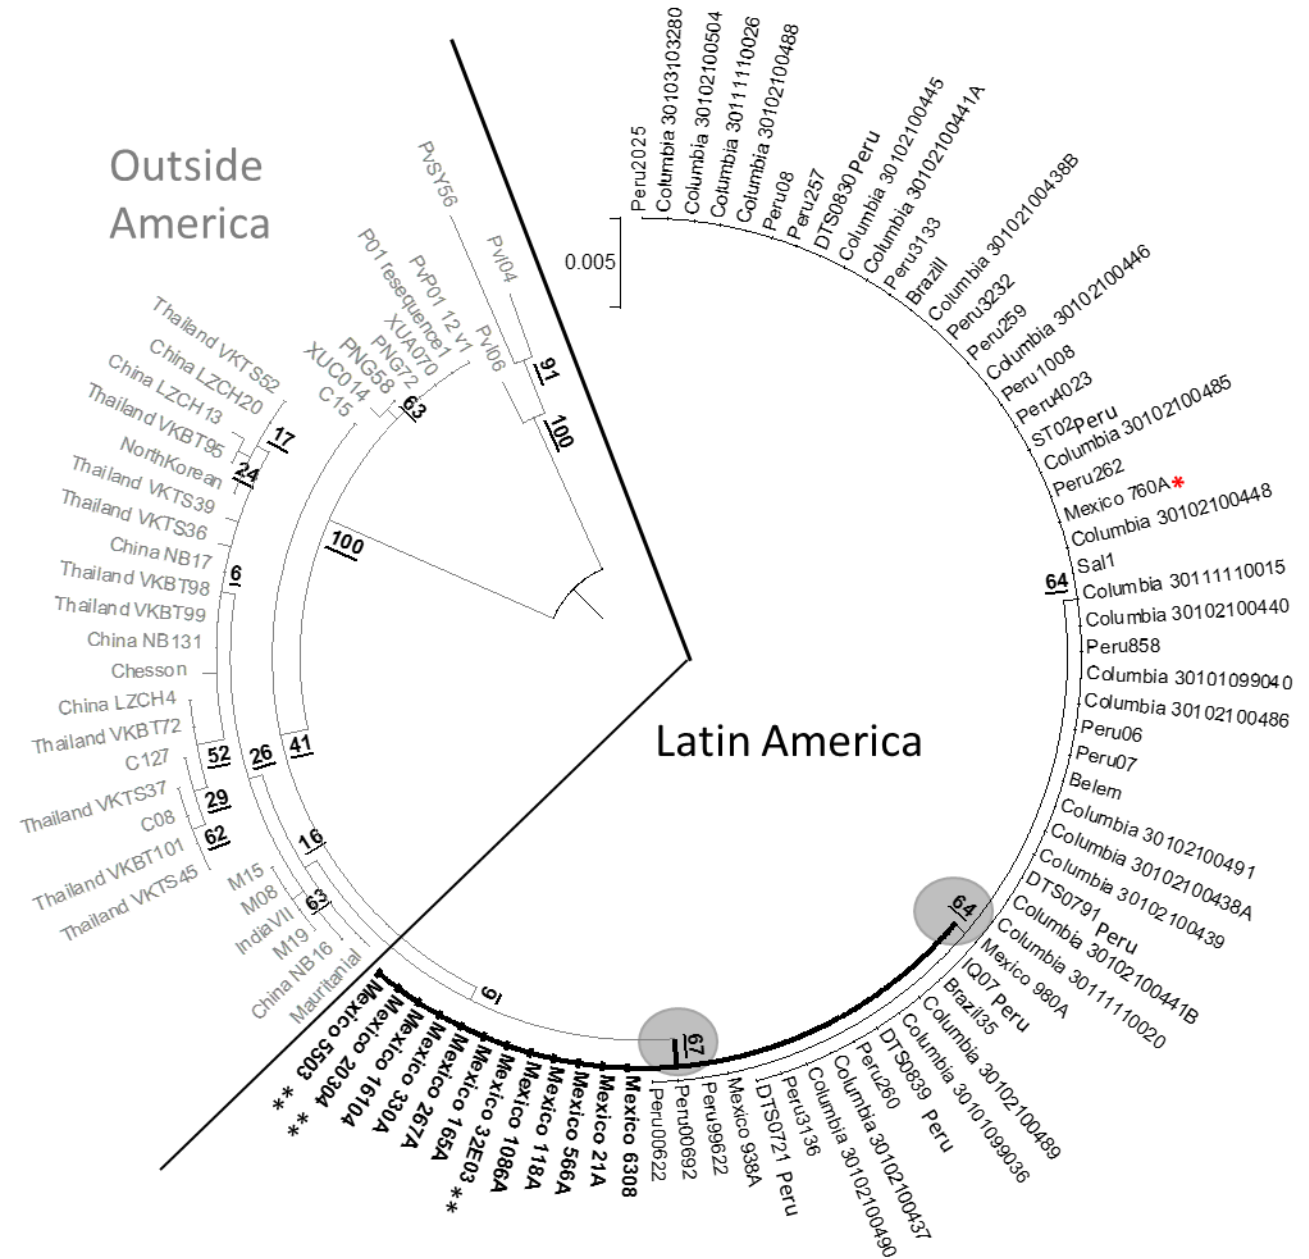

Supplement: Supplementary file [file 21787593]
